1 **Full title**

2 **Intrinsic functional reorganisation of the attention network**  
3 **in the blind**

4 **Running title: Attention network reorganisation in the blind**

5 Wen Qin<sup>1,\*</sup>, Yong Liu<sup>2</sup>, Tianzi Jiang<sup>2</sup>, and Chunshui Yu<sup>1</sup>

6 <sup>1</sup> Department of Radiology and Tianjin Key Laboratory of Functional Imaging,  
7 Tianjin Medical University General Hospital, Tianjin 300052, China

8 <sup>2</sup> Brainnetome Center and National Laboratory of Pattern Recognition, Institute of  
9 Automation, Chinese Academy of Sciences, Beijing 100190, China

10 **\*Correspondence to:** Wen Qin, MD, Department of Radiology, Tianjin Medical  
11 University General Hospital, No. 154, Anshan Road, Heping District, Tianjin 300052,  
12 China; E-mail: wayne.wenqin@gmail.com. Phone: +86-22-60363760; Fax:  
13 +86-22-60362206

14

15

16

17 **Keywords:** attention network; blindness; functional connectivity strength; functional  
18 coupling; functional magnetic resonance imaging; resting-state, visual network; visual  
19 deprivation.

20

## 21 **Abstract**

22 Attention can bias visual perception by modulating the neuronal activity of visual  
23 areas. However, little is known if blindness can reshape the intrinsic functional  
24 organisation within the attention networks and between the attention and visual  
25 networks. A voxel-wise network-based functional connectivity strengthen mapping  
26 analysis was proposed to thirty congenitally, thirty early and thirty late blind subjects,  
27 and thirty sighted controls. Both the blind and sighted subjects exhibited similar  
28 spatial distributions of the intrinsic dorsal (DAN) and ventral (VAN) attention  
29 networks. Moreover, compared to the sighted controls, the blind subjects showed  
30 increased functional coupling within the DAN, and between the DAN and VAN, and  
31 between the attention sub-networks and visual areas, suggesting an increased  
32 information communication by visual deprivation. However, the onset age of  
33 blindness had little impact on the functional coupling of the attention network,  
34 indicating that non-visual sensory experience is enough for driving the development  
35 of intrinsic functional organization of the attention network. Finally, a positive  
36 correlation was identified between the duration of blindness and the functional  
37 coupling of the posterior inferior frontal gyrus with the visual network, representing  
38 an experience-dependent reorganisation after visual deprivation.

## 39 **Introduction**

40 Attention is a cognitive process to focus our limited brain resources to preferentially  
41 process certain external stimuli or internal ideas while ignoring irrelevant ones (Raz  
42 and Buhle 2006). Attention is thought to be controlled by two segregated functional  
43 networks: a bilaterally distributed dorsal attention network (DAN) which is mainly  
44 composed of the frontal eye field (FEF) and intraparietal sulcus (IPS) and involves in  
45 endogenous and exogenous orienting of attention; and a right-lateralized ventral  
46 attention network (VAN) which is mainly consisting of the anterior insula (aINS) and  
47 temporoparietal junction (TPJ) and involves in reorienting of attention in response to  
48 salient stimuli (Corbetta and Shulman 2002; Corbetta et al. 2008). These two attention  
49 networks dynamically interact to determine which aspects of sensory information will  
50 be perceived (Buschman and Miller 2007; McMains and Kastner 2011). Both genetic  
51 and environmental factors can shape the organisation of the attention networks  
52 (Rueda et al. 2005; Bellgrove et al. 2007; Neufang et al. 2015). For example, visual  
53 attention training can improve the attention performance and reshape the attention  
54 networks in sighted subjects (Rueda et al. 2005; Rueda et al. 2012).

55 As blindness interrupts the main information transfer system of the human brain,  
56 long-term visual deprivation may affect attention behavior and reshape the  
57 organisation of the attention networks. In fact, superior auditory/tactile attention  
58 abilities have been observed in blind subjects (Roder et al. 1999; Collignon et al. 2006;  
59 Forster et al. 2007). The congenitally (CB) and early blind (EB) subjects have shown  
60 increased activation in the FEF and IPS of the DAN than the sighted control (SC)  
61 when performing attention-demanding tasks (Burton et al. 2004; Garg et al. 2007;  
62 Stevens et al. 2007; Burton et al. 2010). These findings indicate that visual  
63 deprivation can reshape regional activity of the attention networks. However, it is still  
64 unknown if and how visual deprivation reshapes the intrinsic functional couplings of  
65 the attention networks.

66 In the SC, the attention networks dynamically interact with the visual network  
67 (VN). Stimulus-driven signals from the VN can selectively recruit the VAN based on  
68 their salience and relevance; and top-down signals from the DAN can modulate the  
69 activity of visual areas to improve the perception of specific aspects of visual stimuli  
70 (Buchel et al. 1998a; Tootell et al. 1998; Jack et al. 2006; Silver et al. 2007; Cate et al.  
71 2009; Bressler and Silver 2010). In the CB/EB, despite of the structural reorganisation  
72 (Shimony et al. 2006; Ptito et al. 2008; Jiang et al. 2009; Shu et al. 2009), the  
73 functional specification (location, motion, object, or language processing) of the  
74 occipital cortex is relatively preserved (Amedi et al. 2007; Renier et al. 2010;  
75 Collignon et al. 2011; Reich et al. 2011; Wolbers et al. 2011). However, it is unclear if  
76 the intrinsic functional organisation of the attention networks is also preserved in the  
77 blind. The cross-modal activation of the occipital cortex in the blind is frequently  
78 reported in the attention-demanding nonvisual tasks (Bavelier and Neville 2002;  
79 Collignon et al. 2009; Sathian and Stilla 2010), whereas simple passive  
80 auditory/tactile tasks cannot activate the occipital cortex (Sadato et al. 1996; Sadato et  
81 al. 1998; Weeks et al. 2000). Furthermore, the occipital cortex of the EB can be  
82 activated by pure top-down attention signals, which is very similar with the visual  
83 attention-induced response in the visual cortex in the SC (Gougoux et al. 2005;  
84 Stevens et al. 2007; Renier et al. 2010). These findings suggest that even after visual  
85 deprivation, functional interactions between the attentional and occipital regions still  
86 exist. However, little is known how visual deprivation impacts the intrinsic functional  
87 coupling between the attention and visual networks.

88 Visual deprivation-induced reorganisation may depend on the development  
89 maturity degree of the brain at the time of onset of blindness. Compared to the late  
90 blind (LB), the CB/EB exhibit different reorganisation patterns in cortical thickness  
91 (Jiang et al. 2009; Park et al. 2009; Kupers et al. 2011), glucose metabolism  
92 (Wanet-Defalque et al. 1988; Veraart et al. 1990), task-evoked activation (Buchel et al.  
93 1998b), and functional connectivity density (FCD) (Qin et al. 2015) in the occipital

94 cortex. Using the same auditory attention task, although both the EB and the LB  
95 demonstrated improvement in attention performance, the temporal and spatial  
96 alteration patterns in event-related potentials are largely different (Roder et al. 1999;  
97 Fieger et al. 2006). Nevertheless, we are unclear whether the developmental maturity  
98 degree of the brain at the time of onset of blindness has an effect on the intrinsic  
99 functional organisation of the attention networks in the blind.

100 Most of our knowledge on the functional organisation of the attention networks  
101 comes from the task-based functional magnetic resonance imaging (fMRI) that detects  
102 regional blood-oxygen-level-dependence (BOLD) activation evoked by a specific task  
103 (reflecting functional segregation). In contrast, the resting-state fMRI primarily  
104 focuses on the synchronization of spontaneous activity among brain regions  
105 (reflecting functional integration). A pioneer study has segregated the DAN and VAN  
106 by resting-state functional connectivity (rsFC) analysis (Fox et al. 2006). A following  
107 study further reveals a correlation between attention performance and the rsFC  
108 between the DAN and VAN in normal subjects (Wen et al. 2012). These findings  
109 indicate that rsFC analysis is a promising technique to evaluate the intrinsic functional  
110 organisation of the attention networks.

111 In this study, we recruited gender- and age-matched CB, EB, LB and SC (thirty  
112 subjects in each group), and proposed a voxel-wise network-based functional  
113 connectivity strength (FCS) mapping (NB\_FCSM) method to compare intergroup  
114 FCS differences within each attention network (DAN and VAN), between the DAN  
115 and VAN, and between the attention and visual networks (DAN-VN and VAN-VN).  
116 Based on previous findings in the blind, we proposed four hypotheses: (1) the intrinsic  
117 functional organisation of the attention networks is preserved in the blind because the  
118 same brain regions show activation in non-visual attention tasks in the blind and in  
119 visual attention tasks in the SC (Garg et al. 2007; Stevens et al. 2007; Corbetta et al.  
120 2008; Burton et al. 2010); (2) the blind subjects have increased functional couplings  
121 in the attention network since they show superior non-visual attention performance,

122 and increased activation in the network during non-visual attention tasks (Roder et al.  
123 1999; Collignon et al. 2006; Forster et al. 2007; Garg et al. 2007; Stevens et al. 2007);  
124 (3) the blind subjects have increased functional couplings between the attention and  
125 visual networks for they show increased occipital activation evoked by non-visual  
126 attention-demanding tasks (Gougoux et al. 2005; Stevens et al. 2007; Renier et al.  
127 2010); and (4) the onset and/or duration of blindness may impact the intrinsic  
128 functional organisation of the attention networks in the blind as the CB/EB and LB  
129 show different reorganisation patterns in the occipital cortex (Jiang et al. 2009; Park et  
130 al. 2009; Collignon et al. 2013; Qin et al. 2015).

## 131 **Materials and methods**

### 132 **Subjects**

133 This study recruited 90 right-handed blind subjects and thirty sighted controls (22  
134 males, age range 20-44 years). Blind subjects included thirty CB (onset since birth, 22  
135 males, age range 18-39 years), thirty EB (onset from 0.5 to 12 years old, 22 males,  
136 age range 20-45 years), and thirty LB (onset from 13 to 28 years old, 22 males, age  
137 range 20-38 years). The samples size, age and gender of the four groups were well  
138 matched (Table 1). The protocol was approved by the Medical Research Ethics  
139 Committee of Tianjin Medical University, and written informed consent was obtained  
140 from all participants prior to the experiment.

### 141 **MRI data acquisition**

142 MRI data were obtained using a 3.0 Tesla MR scanner (Trio Tim system; Siemens,  
143 Erlangen, Germany) with a 12-channel head coil. The resting-state fMRI data were  
144 acquired using a gradient-echo echo-planar imaging sequence with the following  
145 parameters: repetition time = 2000 ms, echo time = 30 ms, flip angle = 90°, matrix =  
146 64 × 64, field of view = 220 mm × 220 mm, 32 axial slices with a thickness of 3 mm  
147 and a gap of 1 mm. During scans, all subjects were instructed to keep eyes closed and

148 awake, stay motionless, and think of nothing in particular. The three-dimensional  
149 structural images were acquired using a magnetization-prepared rapid-acquisition  
150 gradient echo sequence: repetition time = 2000 ms, echo time = 2.6 ms, inversion time  
151 = 900 ms, flip angle = 9°, matrix = 256 × 224, field of view = 256 mm × 224 mm, 176  
152 continuous sagittal slices with a thickness of 1 mm.

### 153 **The fMRI data preprocessing**

154 The resting-state fMRI data were preprocessed using Statistical Parametric Mapping  
155 (SPM8, <http://www.fil.ion.ucl.ac.uk/spm>). The first 10 volumes were removed  
156 because of incomplete T1 relaxation, and to allow the participants to adapt to the  
157 scanning environment. The remaining 170 volumes were corrected for the acquisition  
158 time delay between slices and were realigned to the first volume to estimate and  
159 correct rigid head motion. All subjects were within the predefined head motion  
160 thresholds of translation < 2 mm and rotation < 2°. We also calculated the frame-wise  
161 displacement (FD) (Power et al. 2012) and percent of spike motion (defined as FD >  
162 0.5) in each subject. The mean FD was included as an additional nuisance variable  
163 during all fMRI-related statistical analyses to further exclude out the effect of head  
164 motion. Then fMRI dataset were affinely coregistered with the structural volume,  
165 and the structural images were segmented and nonlinearly normalized into the  
166 Montreal Neurological Institute (MNI) space. Finally, the fMRI volumes were written  
167 to the MNI space and resampled into 3-mm<sup>3</sup> voxels using the deformation parameters  
168 derived from structural images. Several spurious variances, including the motion  
169 parameters (six parameters and their first time derivatives), and average BOLD  
170 signals of the whole brain, ventricular and white matter were removed from the  
171 normalized fMRI data through linear regression. After band-pass frequency filtering  
172 (0.01-0.08 Hz), the functional images were spatially smoothed with a Gaussian kernel  
173 of 6 mm full width at half maximum.

## 174 **Attention network extraction**

175 The attention networks were extracted based on a meta-analysis of attention-evoked  
176 coactivation. BrainMap Sleuth 2.0.3 (<http://www.brainmap.org/>) was used to search  
177 papers reporting brain activation evoked by visual attention tasks in right-handed  
178 healthy adults using either positron emission tomography or fMRI. We excluded  
179 conditions aimed to investigate the effects of diseases, handedness, gender or drugs on  
180 task-evoked activation. All retrieved foci were transformed into MNI space and  
181 manually checked to exclude those out of the MNI grey matter mask. A total of 128  
182 papers that included 360 experiments, 4793 subjects, and 3470 foci were finally  
183 included in the meta-analysis.

184 The meta-analysis was performed using the revised version of Activation  
185 Likelihood Estimation (ALE) technique (Eickhoff et al. 2009; Turkeltaub et al. 2012)  
186 implemented in GingerALE 2.3.6 (<http://www.brainmap.org/>). This algorithm aims to  
187 identify regions showing convergent activation across experiments if the merged  
188 activation is higher than the expectation under a random spatial association. For a  
189 given experiment, all activation coordinates are modelled as independent Gaussian  
190 probability distributions and combined to generate a modelled activation (MA) map  
191 for this experiment. To minimize within-experiment foci number and proximity on the  
192 ALE calculation, the maximum probability of each voxel in a given experiment was  
193 considered as the MA value (Turkeltaub et al. 2012). Then, the ALE score of each  
194 voxel was calculated by summing individual MA values of all experiments. A  
195 random-effect non-parametric permutation test was used to identify voxels with  
196 significant ALE differences against the null-hypothesis. Multiple comparisons were  
197 corrected using a false discovery rate (FDR) method ( $q < 0.05$  and cluster size  $> 1000$   
198  $\text{mm}^3$ ). The task-evoked spatial activation pattern in the attention network was shown  
199 in Supplementary Fig. 1.



## 200 **DAN and VAN extraction**

201 As performed in a prior study (Fox et al. 2006), we used rsFC-based conjunction  
202 analysis to define the DAN and VAN. The right FEF [28 -6 52] and IPS [30 -58 46]  
203 were used to identify the DAN, and the right aINS [38 26 -6] and TPJ [58 -42 30]  
204 were used to identify the VAN. These peak MNI coordinates were defined based on  
205 the ALE map (Supplementary Fig. 1). A 6mm-radius sphere centered on each  
206 coordinate was drawn and the overlap voxels between the sphere and ALE map were  
207 taken as the seed. Pearson correlation coefficients between the mean time series of  
208 each seed and that of each voxel of the whole brain were computed and transformed  
209 into  $z$ -values using Fisher's transform. In each group, individuals'  $z$ -values were  
210 entered into a one-sample  $t$ -test to identify brain regions with significant positive  
211 correlations with each seed. The conjunction analysis was then applied to identify the  
212 DAN regions that exhibit positive rsFC with both the FEF and IPS and the VAN  
213 regions that show positive rsFC with both the aINS and TPJ ( $q < 0.05$ , FDR corrected;  
214 cluster size  $> 30$  voxels). The spatial distributions of the DAN and VAN of each group  
215 are shown in Supplementary Figs 2 and 3, respectively. We used a leave-one-out  
216 (LOO) method to verify if the inter-subject variability would impact the spatial  
217 distribution pattern of the DAN and VAN of each group. In each LOO experiment, we  
218 performed conjunction analysis using the same method as the original one after  
219 excluding one subject's rsFC data. The spatial overlapping ratio (SOR) and spatial  
220 correlation coefficient (SCC) of the DAN/VAN between each LOO experiment and  
221 original one were calculated. The SOR and SCC of the DAN/VAN between each pair  
222 of groups were also calculated to evaluate the spatial similarity of the attention  
223 networks among the groups.

224 To increase the functional specificity of the DAN and VAN, we further redefined  
225 the two attention networks within brain regions that showed both high functional  
226 connectivity with the hubs of this network and high activation by visual attention  
227 tasks, which was computed by multiplying the rsFC-based DAN and VAN with the

228 ALE-based coactivation map. Because we aimed to investigate if the intrinsic  
229 functional couplings of brain regions that originally serve visual attention in the SC  
230 would change after visual deprivation, the redefined DAN and VAN were only  
231 calculated from the SC subjects.

### 232 **NB-FCSM**

233 A NB-FCSM method was proposed to voxel-wisely compare intergroup FCS  
234 differences within (DAN and VAN) and between networks (DAN-VAN, DAN-VN  
235 and VAN-VN). Similar to the FCD mapping that measures the degree distribution of  
236 the intrinsic functional networks at the voxel-level (Tomasi and Volkow 2012),  
237 NB\_FCSM measures the weighted degree distribution, namely the FCS (Liang et al.  
238 2013). As an extension of the original whole-brain FCS analysis (Liang et al. 2013),  
239 this method can not only measure FCS distribution within a network, but also map the  
240 FCS between each pair of networks, which can provide information about  
241 inter-network functional coupling. The preprocessing steps were the same as the rsFC  
242 analysis. The pipeline of NB-FCSM is shown in Fig. 1. For within-network FCS, we  
243 first calculated the rsFC between each pair of voxels within a given network to  
244 construct a voxel-wise correlation matrix. Then a threshold ( $P < 0.05$ , uncorrected) of  
245 the positive rsFC was used to sparsify the correlation matrix. Within-network FCS of  
246 a given voxel was calculated as the average rsFC between this voxel and all other  
247 survived voxels within the sparse matrix, and this step was iterated for each remaining  
248 voxel. Similarly, between-network FCS was calculated except that the rsFC was  
249 calculated from each pair of voxels from two different networks (e.g., A and B). We  
250 obtained two between-network FCS measures:  $FCS_{A\&B}$  represents the average rsFC of  
251 one voxel in network A with all survived voxels in network B, and vice versa for FCS  
252  $_{B\&A}$ . To test the effect of connectivity thresholding on our results, we also calculated  
253 FCS using four different thresholds ( $r > 0, 0.1, 0.2$  and  $0.3$ ) and compared the  
254 intergroup differences.

## 255 **Statistical analyses**

256 A fixed-effect general linear model (GLM) was used to voxel-wisely compare  
257 intergroup differences in FCS within each attention network, between the DAN and  
258 VAN, and between the DAN/VAN and VN ( $q < 0.05$ , FDR corrected), controlling for  
259 the effects of age, gender and mean FD. Brain regions with significant FCS  
260 differences were extracted as regions-of-interest (ROIs) and entered into *post-hoc*  
261 comparisons to test pair-wise differences among the four groups ( $q < 0.05$ , FDR  
262 corrected). To clarify which functional connectivities contributed to the FCS changes  
263 in blind subjects, the rsFC between each identified ROI and each voxels of the whole  
264 brain were calculated, and intergroup differences in rsFC were compared using the  
265 same statistical model as the FCS analyses ( $q < 0.05$ , FDR corrected). Finally, partial  
266 correlation analyses controlling for the effects of gender and mean FD were  
267 performed to test possible correlations of regional FCS with onset age and duration of  
268 blindness ( $q < 0.05$ , FDR corrected).

## 269 **Results**

### 270 **Demographic data**

271 The demographic data of these subjects are shown in Table 1. A total of thirty CB,  
272 thirty EB, thirty LB and thirty SC were included in this study. There were no  
273 significant differences in gender ( $\chi^2 = 0$ ,  $P = 1$ ), age ( $F = 1.95$ ,  $P = 0.125$ ), mean FD ( $F$   
274  $= 0.21$ ,  $P = 0.888$ ) and percentage of motion spikes ( $\chi^2 = 2.33$ ,  $P = 0.508$ ) among the four  
275 groups. The age of onset of blindness was 0 year in the CB,  $7.7 \pm 3.2$  years in the EB,  
276 and  $18.0 \pm 4.4$  years in the LB; and the duration of blindness was  $25.7 \pm 4.6$  years in  
277 the CB,  $20.8 \pm 7.9$  years in the EB, and  $10.2 \pm 4.2$  years in the LB.

### 278 **The spatial distribution of the attention network**

279 The spatial distribution of the attention network identified by coordinated-based ALE

280 meta-analysis ( $q < 0.05$ , FDR corrected) is shown in Supplementary Fig. 1. Visual  
281 attention-evoked activation was located in the bilateral FEF, IPS, middle (MFG) and  
282 inferior (IFG) frontal gyrus, superior parietal lobule (SPL), dorsal anterior cingulate  
283 cortex (dACC), aINS, and the right TPJ. The spatial distributions of the DAN and  
284 VAN in each group identified by rsFC-based conjunction analyses ( $q < 0.05$ , FDR  
285 corrected) are shown in Fig. 2A-C, and Supplementary Figs. 2 and 3. The spatial  
286 distribution maps of these two networks were similar among the CB, EB, LB and SC  
287 (SOR:  $56.3 \pm 4.7\%$  for the DAN and  $55.2 \pm 2.2\%$  for the VAN; SCC:  $0.693 \pm 0.038$   
288 for the DAN and  $0.524 \pm 0.048$  for the VAN). The overlapped regions of the DAN for  
289 all groups included the bilateral FEF, IFG, IPS and SPL, whereas the overlapped  
290 regions of the VAN included the right-lateralized TPJ, aINS, IFG, MFG, dACC and  
291 superior frontal gyrus (SFG). LOO methods demonstrated that the spatial distributions  
292 of the rsFC-based DAN/VAN were highly consistent in each group (SOR =  $91.7 \pm$   
293  $1.6\%$ , SCC =  $0.991 \pm 0.004$ ), indicating a highly reproducibility of the resting-state  
294 DAN and VAN (Fig. 2D). The spatial distributions of the redefined DAN and VAN  
295 with both positive rsFC and high activation probability in the SC are shown in Fig. 3.  
296 The DAN was composed of the bilateral FEF, posterior IFG (pIFG), IPS and SPL; and  
297 the VAN was a right-lateralized network and included the aINS, TPJ, pIFG, MFG, and  
298 dACC. The right pIFG was the only region shared by the DAN and VAN.

### 299 **FCS changes within the attention network in the blind**

300 Within the DAN, GLM analysis showed significant intergroup FCS differences ( $q <$   
301  $0.05$ , FDR corrected) in the bilateral SPL/IPS and the right FEF and pIFG (Fig. 4A).  
302 The blind groups generally had increased FCS than the SC group, but they did not  
303 differ from each other. There were no significant FCS differences within the VAN  
304 among the four groups.

305 Significant between-network FCS differences ( $q < 0.05$ , FDR corrected) were  
306 found between the bilateral FEF and SPL/IPS (DAN components) and the VAN (Fig.

307 3B), and between the bilateral aINS, dACC, the right pIFG and TPJ (VAN  
308 components) and the DAN (Fig. 3C). Generally, the FCS in each region was increased  
309 in the blind than in the SC, but there were no significant differences among the blind  
310 groups. The only exception was that the CB had a higher FCS between the right FEF  
311 and the VAN than the EB, and a higher FCS between the left FEF and the VAN than  
312 the LB ( $q < 0.05$ , FDR corrected).

313 In the validation analysis, we recalculated FCS using four different connectivity  
314 thresholds ( $r > 0$ , 0.1, 0.2 and 0.3, respectively) and repeated these intergroup  
315 comparisons. The intergroup FCS differences were highly consistent across the four  
316 thresholds and very similar with the original ones (Supplementary Figs 4 and 5).

### 317 **FCS changes between the attention and visual networks in the blind**

318 The GLM showed significant intergroup FCS differences ( $q < 0.05$ , FDR corrected)  
319 between the DAN and VN (Fig. 5A and B). Generally speaking, compared to the SC,  
320 the blind subjects showed increased FCS between hubs (the bilateral FEF, IPL and  
321 pIFG) of the DAN and the VN and between higher-level visual hubs (the bilateral  
322 superior [SOG] and inferior [IOG] occipital gyri, the left lingual gyrus [LG] and the  
323 right middle occipital gyrus [MOG]) and the DAN, and decreased FCS between the  
324 primary visual areas (the bilateral calcarine sulcus [CalS]) and the DAN (most of  
325 them can pass FDR correction). Among the blind subjects, the CB had a lower FCS  
326 between the left IOG and the DAN compared to the EB and LB, while higher FCS  
327 between the right pIFG and the VN relative to the LB ( $q < 0.05$ , FDR corrected) (Fig.  
328 5A and B).

329 GLM analysis also revealed significant intergroup FCS differences ( $q < 0.05$ ,  
330 FDR corrected) between the VAN and VN (Fig. 5C and D). Compared to the SC, the  
331 blind subjects showed increased FCS between hubs (the right pIFG, MFG, TPJ, and  
332 the bilateral aINS and dACC) of the VAN and the VN and between hubs (most of the  
333 right visual areas, the left middle temporal visual area [MT] and SOG) of the VN and

334 the VAN ( $q < 0.05$ , FDR corrected). No significantly decreased FCS between the  
335 VAN and VN were found in any blind groups. In the blind groups, the CB showed a  
336 higher FCS between the right aINS and the VN than the LB ( $q < 0.05$ , FDR corrected),  
337 and a higher FCS between the right pIFG and the VN than the EB and LB ( $q < 0.05$ ,  
338 FDR corrected) (Fig. 5C and D). As shown in Supplementary Figs 4-6, the intergroup  
339 FCS differences between the attention and visual networks were highly consistent  
340 across rsFC thresholds and very similar with the original ones.

#### 341 **The rsFC changes within the attention network in the blind**

342 Treating all regions with significant FCS differences as seeds, voxel-wise rsFC  
343 analyses ( $q < 0.05$ , FDR corrected) demonstrated: within the DAN, the blind subjects  
344 generally had increased rsFC between the left SPL and the left IPS and pIFG, and  
345 between the right SPL and the right FEF, pIFG and IPS compared to the SC. Blind  
346 subjects also had increased rsFC between most hubs (such as the bilateral FEF and  
347 SPL) of the DAN and those (such as the bilateral aINS and dACC, and right pIFG and  
348 TPJ) of the VAN. However, there were no significant differences in rsFC within the  
349 attention network among blind subjects (Supplementary Fig. S7).

#### 350 **The rsFC changes between the attention and visual networks in the blind**

351 Voxel-wise rsFC analyses ( $q < 0.05$ , FDR corrected) demonstrated that most hubs  
352 (including bilateral FEF, IPL and pIFG) of the DAN had increased rsFC with  
353 higher-level visual areas in the blind compared with the SC, while the primary visual  
354 areas (bilateral CalS) showed decreased rsFC with most DAN hubs (Supplementary  
355 Fig. S8). Blind subjects also had increased rsFC between most hubs (such as the  
356 bilateral dACC and aINS, and right MFG, pIFG, and TPJ) of the VAN and those (such  
357 as the bilateral MT and SOG) of the VN (Supplementary Fig. S9). There were no  
358 significant differences in rsFC of DAN-VN and VAN-VN among blind subjects.

### 359 **Correlations between connectivity changes and blindness chronometry**

360 While controlling for gender and head motion effects, partial correlation analyses ( $q <$   
361  $0.05$ , FDR corrected) showed that duration of blindness was positively correlated with  
362 the FCS between the right pIFG of both the VAN ( $pr = 0.346$ ,  $P < 0.001$ ) and DAN  
363 ( $pr = 0.311$ ,  $P = 0.003$ ) and the VN, and negatively correlated with the FCS between  
364 the left IOG of the VN and the DAN ( $pr = -0.326$ ,  $P = 0.002$ ) (Fig. 9). Furthermore,  
365 after additionally controlling for the onset of blindness, the correlations between the  
366 right pIFG of the VAN and the VN and between the left IOG of the VN and the DAN  
367 were still significant. There were no significant correlations between the FCS of each  
368 ROI and the age of onset of blindness ( $q < 0.05$ , FDR corrected).

### 369 **Discussion**

370 In this study, we found that the blind had similar spatial pattern of the attention  
371 network with the SC, suggesting that the intrinsic functional organisation of the  
372 attention network is preserved in the blind. The blind subjects showed increased  
373 functional connectivity within the DAN, between the DAN and VAN, and between  
374 the attention and visual networks, indicating increased information communication  
375 within and between these attention-related networks in the blind. The lack of  
376 connectivity differences between the blind groups and the lack of correlations  
377 between connectivity and onset age of blindness suggest that the intrinsic functional  
378 organisation of the attention network is not influenced by its developmental maturity  
379 degree at the time of onset of blindness. Our study provided systematic knowledge of  
380 the intrinsic functional reorganisation of the attention networks by blindness with  
381 different onset age, and can improved our understanding about the interactions  
382 between higher-level attention network and visual areas in compensating for visual  
383 loss..

384 **Methodological consideration**

385 In light of the FCD that voxel-wisely measure the unweighted degree distribution of  
386 the whole brain network (Tomasi and Volkow 2012), the FCS is proposed to  
387 voxel-wisely measure the weighted degree distribution of the network (Liang et al.  
388 2013). In contrast to the FCD that is sensitive to connection thresholds, the FCS is  
389 insensitive to connection thresholds because of the weighting property, which is  
390 supported by our findings of different connection thresholds resulting in similar  
391 intergroup FCS differences. Here, we extended the traditional whole-brain-level FCS  
392 analysis to voxel-wisely assess the FCS within and between networks, namely the  
393 NB-FCSM. Compared with the independent component analysis (ICA) that is  
394 typically used to measure the global between-network functional connectivity (Allen  
395 et al. 2014; Wang et al. 2014), our voxel-wise between-network FCS analysis can  
396 identify the specific brain regions with between-network connectivity differences  
397 between groups. A prerequisite for robust application of NB-FCSM is accurate  
398 definition of networks of interest. Here, we combined the coordinated-based ALE  
399 meta-analysis and the rsFC-based conjunction analysis to more accurately define the  
400 DAN and VAN. Thus, each voxel of the redefined attention networks possess both  
401 high functional connectivity and coactivation, which was used for NB-FCSM.

402 **Preserved intrinsic functional organisation in the attention network in the blind**

403 The human attention system closely interacts with the sensory systems. For example,  
404 the VAN controls stimulus-driven reorienting from sensory modalities and the DAN  
405 generates top-down signals to bias the response of the sensory cortex (Astafiev et al.  
406 2003; Kincade et al. 2005) (Astafiev et al. 2006; Indovina and Macaluso 2007). As the  
407 main information input of the human brain, visual experience plays an important role  
408 in establishing and reshaping the functional organisation of the attention network. For  
409 example, visual attention training can reshape the attention network in normal  
410 subjects (Rueda et al., 2005; Rueda et al., 2012). In this study, we found that the



411 attention networks showed similar spatial distribution in the blind and the SC,  
412 suggesting that the intrinsic functional organisation of the attention networks is  
413 preserved in the blind. This finding also indicates that the functional organisation of  
414 the attention network can be normally established in the blind by receiving inputs  
415 from non-visual sensory modalities because there are dense connections between the  
416 attentional regions and the thalamus (Behrens et al. 2003) and non-visual sensory  
417 cortices (Umarova et al. 2010). The preserved functional organisation of the attention  
418 network in the blind may provide new evidence for the supramodal nature of the  
419 attention regions, which is supported by the sensory modality-independent functional  
420 specialization of the attention network. For example, a certain attentional region is  
421 functionally specialized for processing a specific type of attention despite of the  
422 inputs from what sensory modalities (Downar et al. 2000; Smith et al. 2010; Ptak  
423 2012).

#### 424 **Enhanced intrinsic functional coupling of the attention network in the blind**

425 Superior auditory/tactile attention performance has been frequently reported in the  
426 blind (Roder et al. 1999; Collignon et al. 2006; Forster et al. 2007; Collignon and De  
427 Volder 2009). Enhanced activation in the FEF and IPS is also observed in the CB/EB  
428 compared the SC when performing attention-demanding tasks (Burton et al. 2004;  
429 Garg et al. 2007; Stevens et al. 2007; Burton et al. 2010). In this study, we found  
430 increased functional couplings within and between the attention networks in the blind,  
431 which may provide an explanation for the superior attention performance from a new  
432 perspective of functional integration. We found increased connectivity in the DAN but  
433 not in the VAN in the blind, which is consistent with previous studies reporting  
434 enhanced activation only in the DAN regions in the CB/EB than the SC during  
435 attention-demanding tasks (Burton et al. 2004; Garg et al. 2007; Stevens et al. 2007;  
436 Burton et al. 2010). This finding suggests that the DAN and VAN respond differently  
437 to visual deprivation, reflecting different dependencies of the development of the

438 functional organisation of the DAN and VAN on visual experience.

439       The DAN and VAN do not work independently, instead, they closely interact to  
440 determine which aspects of sensory information will be attended to (Buschman and  
441 Miller 2007; McMains and Kastner 2011). In consistent with a previous study (Fox et  
442 al. 2006), we found that the right posterior IFG/MFG was the region shared by the  
443 DAN and VAN, which may be the anatomical substrate for information  
444 communication between the two attention networks. In the theory of reorienting  
445 (Corbetta et al. 2008), when one focuses on an object, the DAN sends sustained  
446 top-down inhibition signals to the right TPJ to prevent unimportant and low-relevant  
447 stimuli from transferring to the VAN; when the stimuli are important and relevant  
448 enough to break the inhibition by the TPJ, the VAN is activated and sends the  
449 reorienting salient signals to the DAN. The increased intrinsic functional coupling  
450 between the DAN and VAN suggests that the information transfer efficiency or the  
451 functional integration of the attention networks is enhanced after visual deprivation,  
452 which may facilitate the switching between top-down attention and stimulus-driven  
453 reorienting. This finding may explain why the blind subjects have superior attention  
454 performance (Roder et al. 1999; Collignon et al. 2006; Forster et al. 2007; Collignon  
455 and De Volder 2009).

#### 456 **Enhanced intrinsic functional coupling between the attention and visual** 457 **networks in the blind**

458 In the SC, the DAN strongly interacts with the visual areas to bias the visual  
459 perception (Buchel et al. 1998a; Tootell et al. 1998; Jack et al. 2006; Silver et al. 2007;  
460 Cate et al. 2009; Bressler and Silver 2010). In the blind, the deprived visual  
461 perception of the V1 may cause reduced functional coupling between the DAN and  
462 the V1. In contrast, the V1 of the blind involves in attention-demanding nonvisual  
463 tasks (Bavelier and Neville 2002; Collignon et al. 2009; Sathian and Stilla 2010),  
464 which may cause an increased functional coupling between the DAN and the V1.

465 Thus, the reduced functional coupling between the DAN and the V1 in the blind may  
466 be a combined consequence of these two mechanisms. The same mechanisms can also  
467 be applied to explain for the increased functional coupling between the VAN and the  
468 V1 in the blind. In contrast to the V1, the functional specialization of the higher-level  
469 visual areas has found to be preserved to process non-visual stimuli in the blind  
470 (Amedi et al. 2007; Renier et al. 2010; Collignon et al. 2011; Reich et al. 2011;  
471 Wolbers et al. 2011). They can interact with the attention networks to process  
472 non-visual attention tasks after visual deprivation (Buchel et al. 1998a; Tootell et al.  
473 1998; Jack et al. 2006; Silver et al. 2007; Cate et al. 2009; Bressler and Silver 2010).  
474 Thus, our findings of the increased functional coupling between the attention and  
475 higher-level visual areas in the blind may reflect an increased interaction between  
476 them, which may provide an explanation for the increased attention task-evoked  
477 activation (Garg et al. 2007; Stevens et al. 2007) and baseline brain activity and  
478 metabolism (Wanet-Defalque et al. 1988; Veraart et al. 1990; Jiang et al. 2015) in  
479 these regions, and superior attention performance (Roder et al. 1999; Collignon et al.  
480 2006; Forster et al. 2007; Collignon and De Volder 2009) in the blind.

#### 481 **Functional reorganisation of the attention-related networks and brain maturity**

482 In the blind, the structural and functional reorganisation of the visual cortex has been  
483 found to be dependent on the development maturity degree of the visual cortex at the  
484 time of onset of blindness. Before or within the critical developmental period, visual  
485 deprivation results in more significant reorganisation in the occipital cortex than that  
486 occurs after the period. Compared to the LB, the CB/EB have more significant  
487 changes in cortical thickness (Jiang et al. 2009; Park et al. 2009; Kupers et al. 2011),  
488 glucose metabolism (Wanet-Defalque et al. 1988; Veraart et al. 1990), task-evoked  
489 activation (Buchel et al. 1998b), and FCD (Qin et al. 2015) in the occipital cortex.  
490 Unexpectedly, we found that the functional reorganisation of the attention-related  
491 networks was quite similar among the three blind groups and was not correlated with

492 onset age of blindness, indicating that the functional reorganisation of the  
493 attention-related networks is not dependent on their development maturity degree at  
494 the time of onset of blindness. That is, the non-visual sensory experience is enough  
495 for driving the development of the functional organisation of the attention networks.  
496 The increased functional coupling may be related to enhancing or unmasking  
497 connections of the attention-related networks (Kupers et al. 2011; Qin and Yu 2013).

498 In contrast, although the blind people similarly demonstrated increased intrinsic  
499 functional coupling between the attention and visual networks, some hubs and  
500 connections between the two networks can also impacted by blindness duration. The  
501 most vulnerable attention area is the posterior IFG, the conjunction hub of DAN and  
502 VAN (Fox et al. 2006), whose functional coupling with the VN was affected by  
503 duration of visual deprivation, indicating the experience-dependent factors may  
504 reshape the intrinsic functional connectivity.

## 505 **Conclusions**

506 In summary, our findings demonstrated that long-term visual deprivation can  
507 reshape the intrinsic functional coupling within the attention network, and between  
508 the attention and visual networks; furthermore, the functional reorganisation of the  
509 attention-related networks is not dependent on their development maturity degree at  
510 the time of onset of blindness. These compensatory changes may help blind people to  
511 more effectively allocate the remaining sensory resources to be aware of the  
512 surrounding environment.

513

## 514 **Acknowledgments**

515 This work was supported by the Natural Science Foundation of China (81771818  
516 and 81425013), National Key Research and Development Program of China

517 (2018YFC1314300), and Tianjin Key Technology R&D Program  
518 (17ZXMFSY00090).

519

## 520 **References:**

521 Allen EA, Damaraju E, Plis SM, Erhardt EB, Eichele T, Calhoun VD. 2014. Tracking whole-brain  
522 connectivity dynamics in the resting state. *Cereb Cortex*. 24:663-676.

523 Amedi A, Stern WM, Camprodon JA, Bermpohl F, Merabet L, Rotman S, Hemond C, Meijer P,  
524 Pascual-Leone A. 2007. Shape conveyed by visual-to-auditory sensory substitution activates the  
525 lateral occipital complex. *Nat Neurosci*. 10:687-689.

526 Astafiev SV, Shulman GL, Corbetta M. 2006. Visuospatial reorienting signals in the human  
527 temporo-parietal junction are independent of response selection. *Eur J Neurosci*. 23:591-596.

528 Astafiev SV, Shulman GL, Stanley CM, Snyder AZ, Van Essen DC, Corbetta M. 2003. Functional  
529 organisation of human intraparietal and frontal cortex for attending, looking, and pointing. *J*  
530 *Neurosci*. 23:4689-4699.

531 Bavelier D, Neville HJ. 2002. Cross-modal plasticity: where and how? *Nat Rev Neurosci*. 3:443-452.

532 Behrens TE, Johansen-Berg H, Woolrich MW, Smith SM, Wheeler-Kingshott CA, Boulby PA, Barker  
533 GJ, Sillery EL, Sheehan K, Ciccarelli O, Thompson AJ, Brady JM, Matthews PM. 2003.  
534 Non-invasive mapping of connections between human thalamus and cortex using diffusion  
535 imaging. *Nat Neurosci*. 6:750-757.

536 Bellgrove MA, Chambers CD, Johnson KA, Daibhis A, Daly M, Hawi Z, Lambert D, Gill M,  
537 Robertson IH. 2007. Dopaminergic genotype biases spatial attention in healthy children. *Mol*

- 538           Psychiatry. 12:786-792.
- 539   Bressler DW, Silver MA. 2010. Spatial attention improves reliability of fMRI retinotopic mapping  
540           signals in occipital and parietal cortex. *Neuroimage*. 53:526-533.
- 541   Buchel C, Josephs O, Rees G, Turner R, Frith CD, Friston KJ. 1998a. The functional anatomy of  
542           attention to visual motion. A functional MRI study. *Brain*. 121:1281-1294.
- 543   Buchel C, Price C, Frackowiak RS, Friston K. 1998b. Different activation patterns in the visual cortex  
544           of late and congenitally blind subjects. *Brain*. 121 ( Pt 3):409-419.
- 545   Burton H, Sinclair RJ, Dixit S. 2010. Working memory for vibrotactile frequencies: comparison of  
546           cortical activity in blind and sighted individuals. *Hum Brain Mapp*. 31:1686-1701.
- 547   Burton H, Sinclair RJ, McLaren DG. 2004. Cortical activity to vibrotactile stimulation: an fMRI study  
548           in blind and sighted individuals. *Hum Brain Mapp*. 23:210-228.
- 549   Buschman TJ, Miller EK. 2007. Top-down versus bottom-up control of attention in the prefrontal and  
550           posterior parietal cortices. *Science*. 315:1860-1862.
- 551   Cate AD, Herron TJ, Yund EW, Stecker GC, Rinne T, Kang X, Petkov CI, Disbrow EA, Woods DL.  
552           2009. Auditory attention activates peripheral visual cortex. *PLoS One*. 4:e4645.
- 553   Collignon O, De Volder AG. 2009. Further evidence that congenitally blind participants react faster to  
554           auditory and tactile spatial targets. *Can J Exp Psychol*. 63:287-293.
- 555   Collignon O, Dormal G, Albouy G, Vandewalle G, Voss P, Phillips C, Lepore F. 2013. Impact of  
556           blindness onset on the functional organisation and the connectivity of the occipital cortex. *Brain*.  
557           136:2769-2783.
- 558   Collignon O, Renier L, Bruyer R, Tranduy D, Veraart C. 2006. Improved selective and divided spatial

- 559 attention in early blind subjects. *Brain Res.* 1075:175-182.
- 560 Collignon O, Vandewalle G, Voss P, Albouy G, Charbonneau G, Lassonde M, Lepore F. 2011.
- 561 Functional specialization for auditory-spatial processing in the occipital cortex of congenitally
- 562 blind humans. *Proc Natl Acad Sci U S A.* 108:4435-4440.
- 563 Collignon O, Voss P, Lassonde M, Lepore F. 2009. Cross-modal plasticity for the spatial processing of
- 564 sounds in visually deprived subjects. *Exp Brain Res.* 192:343-358.
- 565 Corbetta M, Patel G, Shulman GL. 2008. The reorienting system of the human brain: from environment
- 566 to theory of mind. *Neuron.* 58:306-324.
- 567 Corbetta M, Shulman GL. 2002. Control of goal-directed and stimulus-driven attention in the brain.
- 568 *Nat Rev Neurosci.* 3:201-215.
- 569 Downar J, Crawley AP, Mikulis DJ, Davis KD. 2000. A multimodal cortical network for the detection
- 570 of changes in the sensory environment. *Nat Neurosci.* 3:277-283.
- 571 Eickhoff SB, Laird AR, Grefkes C, Wang LE, Zilles K, Fox PT. 2009. Coordinate-based activation
- 572 likelihood estimation meta-analysis of neuroimaging data: a random-effects approach based on
- 573 empirical estimates of spatial uncertainty. *Hum Brain Mapp.* 30:2907-2926.
- 574 Fieger A, Roder B, Teder-Salejarvi W, Hillyard SA, Neville HJ. 2006. Auditory spatial tuning in
- 575 late-onset blindness in humans. *J Cogn Neurosci.* 18:149-157.
- 576 Forster B, Eardley AF, Eimer M. 2007. Altered tactile spatial attention in the early blind. *Brain Res.*
- 577 1131:149-154.
- 578 Fox MD, Corbetta M, Snyder AZ, Vincent JL, Raichle ME. 2006. Spontaneous neuronal activity
- 579 distinguishes human dorsal and ventral attention systems. *Proc Natl Acad Sci U S A.*

580 103:10046-10051.

581 Garg A, Schwartz D, Stevens AA. 2007. Orienting auditory spatial attention engages frontal eye fields  
582 and medial occipital cortex in congenitally blind humans. *Neuropsychologia*. 45:2307-2321.

583 Gougoux F, Zatorre RJ, Lassonde M, Voss P, Lepore F. 2005. A functional neuroimaging study of  
584 sound localization: visual cortex activity predicts performance in early-blind individuals. *PLoS*  
585 *Biol*. 3:e27.

586 Indovina I, Macaluso E. 2007. Dissociation of stimulus relevance and saliency factors during shifts of  
587 visuospatial attention. *Cereb Cortex*. 17:1701-1711.

588 Jack AI, Shulman GL, Snyder AZ, McAvoy M, Corbetta M. 2006. Separate modulations of human V1  
589 associated with spatial attention and task structure. *Neuron*. 51:135-147.

590 Jiang A, Tian J, Li R, Liu Y, Jiang T, Qin W, Yu C. 2015. Alterations of Regional Spontaneous Brain  
591 Activity and Gray Matter Volume in the Blind. *Neural Plast*. 2015:141950.

592 Jiang J, Zhu W, Shi F, Liu Y, Li J, Qin W, Li K, Yu C, Jiang T. 2009. Thick visual cortex in the early  
593 blind. *J Neurosci*. 29:2205-2211.

594 Kincade JM, Abrams RA, Astafiev SV, Shulman GL, Corbetta M. 2005. An event-related functional  
595 magnetic resonance imaging study of voluntary and stimulus-driven orienting of attention. *J*  
596 *Neurosci*. 25:4593-4604.

597 Kupers R, Pietrini P, Ricciardi E, Ptito M. 2011. The nature of consciousness in the visually deprived  
598 brain. *Front Psychol*. 2:19.

599 Liang X, Zou Q, He Y, Yang Y. 2013. Coupling of functional connectivity and regional cerebral blood  
600 flow reveals a physiological basis for network hubs of the human brain. *Proc Natl Acad Sci U S*



- 601           A. 110:1929-1934.
- 602   McMains S, Kastner S. 2011. Interactions of top-down and bottom-up mechanisms in human visual  
603           cortex. *J Neurosci.* 31:587-597.
- 604   Neufang S, Geiger MJ, Homola GA, Mahr M, Akhrif A, Nowak J, Reif A, Romanos M, Deckert J,  
605           Solymosi L, Domschke K. 2015. Modulation of prefrontal functioning in attention systems by  
606           NPSR1 gene variation. *Neuroimage.* 114:199-206.
- 607   Park HJ, Lee JD, Kim EY, Park B, Oh MK, Lee S, Kim JJ. 2009. Morphological alterations in the  
608           congenital blind based on the analysis of cortical thickness and surface area. *Neuroimage.*  
609           47:98-106.
- 610   Power JD, Barnes KA, Snyder AZ, Schlaggar BL, Petersen SE. 2012. Spurious but systematic  
611           correlations in functional connectivity MRI networks arise from subject motion. *Neuroimage.*  
612           59:2142-2154.
- 613   Ptak R. 2012. The frontoparietal attention network of the human brain: action, saliency, and a priority  
614           map of the environment. *Neuroscientist.* 18:502-515.
- 615   Ptito M, Schneider FC, Paulson OB, Kupers R. 2008. Alterations of the visual pathways in congenital  
616           blindness. *Exp Brain Res.* 187:41-49.
- 617   Qin W, Xuan Y, Liu Y, Jiang T, Yu C. 2015. Functional Connectivity Density in Congenitally and Late  
618           Blind Subjects. *Cereb Cortex.* 25:2507-2516.
- 619   Qin W, Yu C. 2013. Neural pathways conveying nonvisual information to the visual cortex. *Neural Plast.*  
620           2013:864920.
- 621   Raz A, Buhle J. 2006. Typologies of attentional networks. *Nat Rev Neurosci.* 7:367-379.

- 622 Reich L, Szwed M, Cohen L, Amedi A. 2011. A ventral visual stream reading center independent of  
623 visual experience. *Curr Biol.* 21:363-368.
- 624 Renier LA, Anurova I, De Volder AG, Carlson S, VanMeter J, Rauschecker JP. 2010. Preserved  
625 functional specialization for spatial processing in the middle occipital gyrus of the early blind.  
626 *Neuron.* 68:138-148.
- 627 Roder B, Teder-Salejarvi W, Sterr A, Rosler F, Hillyard SA, Neville HJ. 1999. Improved auditory  
628 spatial tuning in blind humans. *Nature.* 400:162-166.
- 629 Rueda MR, Checa P, Combita LM. 2012. Enhanced efficiency of the executive attention network after  
630 training in preschool children: immediate changes and effects after two months. *Dev Cogn*  
631 *Neurosci.* 2 Suppl 1:S192-204.
- 632 Rueda MR, Rothbart MK, McCandliss BD, Saccomanno L, Posner MI. 2005. Training, maturation, and  
633 genetic influences on the development of executive attention. *Proc Natl Acad Sci U S A.*  
634 102:14931-14936.
- 635 Sadato N, Pascual-Leone A, Grafman J, Deiber MP, Ibanez V, Hallett M. 1998. Neural networks for  
636 Braille reading by the blind. *Brain.* 121 ( Pt 7):1213-1229.
- 637 Sadato N, Pascual-Leone A, Grafman J, Ibanez V, Deiber MP, Dold G, Hallett M. 1996. Activation of  
638 the primary visual cortex by Braille reading in blind subjects. *Nature.* 380:526-528.
- 639 Sathian K, Stilla R. 2010. Cross-modal plasticity of tactile perception in blindness. *Restor Neurol*  
640 *Neurosci.* 28:271-281.
- 641 Shimony JS, Burton H, Epstein AA, McLaren DG, Sun SW, Snyder AZ. 2006. Diffusion tensor  
642 imaging reveals white matter reorganisation in early blind humans. *Cereb Cortex.*

- 643 16:1653-1661.
- 644 Shu N, Li J, Li K, Yu C, Jiang T. 2009. Abnormal diffusion of cerebral white matter in early blindness.
- 645 Hum Brain Mapp. 30:220-227.
- 646 Silver MA, Ress D, Heeger DJ. 2007. Neural correlates of sustained spatial attention in human early
- 647 visual cortex. J Neurophysiol. 97:229-237.
- 648 Smith DV, Davis B, Niu K, Healy EW, Bonilha L, Fridriksson J, Morgan PS, Rorden C. 2010. Spatial
- 649 attention evokes similar activation patterns for visual and auditory stimuli. J Cogn Neurosci.
- 650 22:347-361.
- 651 Stevens AA, Snodgrass M, Schwartz D, Weaver K. 2007. Preparatory activity in occipital cortex in
- 652 early blind humans predicts auditory perceptual performance. J Neurosci. 27:10734-10741.
- 653 Tomasi D, Volkow ND. 2012. Aging and functional brain networks. Mol Psychiatry. 17:471, 549-458.
- 654 Tootell RB, Hadjikhani N, Hall EK, Marrett S, Vanduffel W, Vaughan JT, Dale AM. 1998. The
- 655 retinotopy of visual spatial attention. Neuron. 21:1409-1422.
- 656 Turkeltaub PE, Eickhoff SB, Laird AR, Fox M, Wiener M, Fox P. 2012. Minimizing within-experiment
- 657 and within-group effects in Activation Likelihood Estimation meta-analyses. Hum Brain Mapp.
- 658 33:1-13.
- 659 Umarova RM, Saur D, Schnell S, Kaller CP, Vry MS, Glauche V, Rijntjes M, Hennig J, Kiselev V,
- 660 Weiller C. 2010. Structural connectivity for visuospatial attention: significance of ventral
- 661 pathways. Cereb Cortex. 20:121-129.
- 662 Veraart C, De Volder AG, Wanet-Defalque MC, Bol A, Michel C, Goffinet AM. 1990. Glucose
- 663 utilization in human visual cortex is abnormally elevated in blindness of early onset but

664 decreased in blindness of late onset. *Brain Res.* 510:115-121.

665 Wanet-Defalque MC, Veraart C, De Volder A, Metz R, Michel C, Doods G, Goffinet A. 1988. High  
666 metabolic activity in the visual cortex of early blind human subjects. *Brain Res.* 446:369-373.

667 Wang D, Qin W, Liu Y, Zhang Y, Jiang T, Yu C. 2014. Altered resting-state network connectivity in  
668 congenital blind. *Hum Brain Mapp.* 35:2573-2581.

669 Weeks R, Horwitz B, Aziz-Sultan A, Tian B, Wessinger CM, Cohen LG, Hallett M, Rauschecker JP.  
670 2000. A positron emission tomographic study of auditory localization in the congenitally blind. *J*  
671 *Neurosci.* 20:2664-2672.

672 Wen X, Yao L, Liu Y, Ding M. 2012. Causal interactions in attention networks predict behavioral  
673 performance. *J Neurosci.* 32:1284-1292.

674 Wolbers T, Zahorik P, Giudice NA. 2011. Decoding the direction of auditory motion in blind humans.  
675 *Neuroimage.* 56:681-687.

676

**Table 1: Demographic information of blind and sighted subjects**

| Measures                                      | CB              | EB              | LB              | SC              | Statistics        | <i>P</i> value |
|-----------------------------------------------|-----------------|-----------------|-----------------|-----------------|-------------------|----------------|
| Gender (male/female)                          | 22 / 8          | 22 / 8          | 22 / 8          | 22 / 8          | $\chi^2 = 0^a$    | 1              |
| Age (mean $\pm$ SD), years                    | 25.7 $\pm$ 4.6  | 28.5 $\pm$ 6.6  | 28.2 $\pm$ 4.1  | 28.6 $\pm$ 5.9  | $F = 1.95$        | 0.125          |
| Onset age of blindness (mean $\pm$ SD), years | 0               | 7.7 $\pm$ 3.2   | 18.0 $\pm$ 4.4  | /               | /                 | /              |
| Duration of blindness (mean $\pm$ SD), years  | 25.7 $\pm$ 4.6  | 20.8 $\pm$ 7.9  | 10.2 $\pm$ 4.2  | /               | /                 | /              |
| Mean FD (mean $\pm$ SD)                       | 0.15 $\pm$ 0.07 | 0.16 $\pm$ 0.05 | 0.15 $\pm$ 0.07 | 0.14 $\pm$ 0.05 | $F = 0.21$        | 0.888          |
| Motion spikes (mean $\pm$ SD), %              | 1.69 $\pm$ 2.54 | 1.59 $\pm$ 2.35 | 2.31 $\pm$ 4.35 | 0.94 $\pm$ 1.79 | $\chi^2 = 2.33^b$ | 0.508          |

Note: <sup>a</sup> chi-square test. <sup>b</sup> Kruskal Wallis Test, A motion spike is defined as a time point with FD > 0.5. CB = congenitally blind, EB = early blind, FD = frame-wise displacement, SC = sighted control, SD = standard deviation.

## Figure Legends

### **Figure 1. Pipeline of network-based functional connectivity mapping.**

Abbreviations: FC = functional connectivity, FCS = functional connectivity strength.

There are four main steps for NB-FCSM: A) Extracting the timecourses of each voxel for each network; B) calculating the functional correlation matrix within each network and between each pair of networks; C) calculating the functional connectivity strength of each voxel; D) generating the FCS maps of each network and between each pair of networks.

### **Figure 2. Spatial similarities of the dorsal and ventral attention networks derived from rsFC-based conjunction analysis. (A) and (B) show spatial overlaps of the DAN and VAN across groups, respectively. The color of each voxel indicates the number of groups (1 to 4) that share this voxel in the DAN or VAN. (C) represents the spatial correlation coefficients and overlapping ratio of the attention networks between each pair of groups. (D) shows the spatial correlation coefficients and overlapping ratio of the attention networks between each LOO iteration and the use of full data in each group.**

### **Figure 3. The refined dorsal and ventral attention networks in the sighted controls.**

The DAN (A) and VAN (B) were identified by combination of ALE-based coactivation and rsFC-based conjunction analyses ( $q < 0.05$ , FDR corrected). Each non-zero voxel of an attention network has both positive rsFC with the hubs of this network and high activation probability by visual attention tasks. The color bar represents the T value of the conjunction analysis. The DAN (red) and VAN (blue) are spatially overlapped at the right posterior IFG (green) (C).

**Figure 4. FCS changes within the attention networks in the blind.** General linear model is used to compare FCS differences within the attention networks between the total blind subjects and the sighted controls ( $q < 0.05$ , FDR corrected), while controlling for the effects of age, gender, and mean FD. Color bar represents the T value. Warm and cold colors represent increased and decreased FCS in the blind, respectively. **(A)** shows the intergroup FCS differences within the DAN; **(B)** shows brain regions of the DAN that exhibit intergroup differences in FCS with the VAN; and **(C)** shows brain regions of the VAN that exhibit intergroup differences in FCS with the DAN. The lines connecting any two groups in bar graphs indicate significant differences between the two groups ( $q < 0.05$ , FDR corrected).

**Figure 5. FCS changes between the attention and visual networks in the blind.** General linear model is used to compare FCS (between the attention and visual networks) differences between the total blind subjects and the sighted controls ( $q < 0.05$ , FDR corrected), while controlling for the effects of age, gender, and mean FD. Color bar represents the T value. Warm and cold colors represent increased and decreased FCS in the blind, respectively. **(A)** shows brain regions of the DAN that exhibit intergroup differences in FCS with the VN; **(B)** shows brain regions of the VN that exhibit intergroup differences in FCS with the DAN; **(C)** shows brain regions of the VAN that exhibit intergroup differences in FCS with the VN; **(D)** shows brain regions of the VN that exhibit intergroup differences in FCS with the VAN. The lines connecting any two groups in bar graphs indicate significant differences between the two groups ( $q < 0.05$ , FDR corrected).

**Figure 6. Correlations between duration of blindness and FCS in the blind.** Partial correlation analyses controlling for the effects of gender and mean FD are performed to test correlations between duration of blindness and regional FCS in the blind ( $q < 0.05$ , FDR corrected).

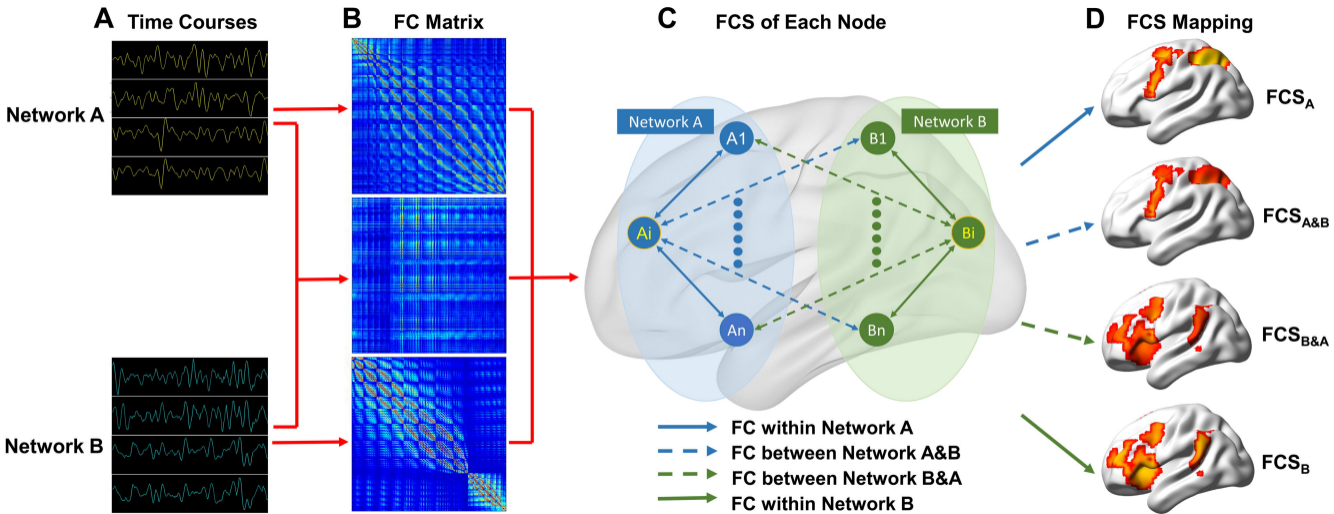



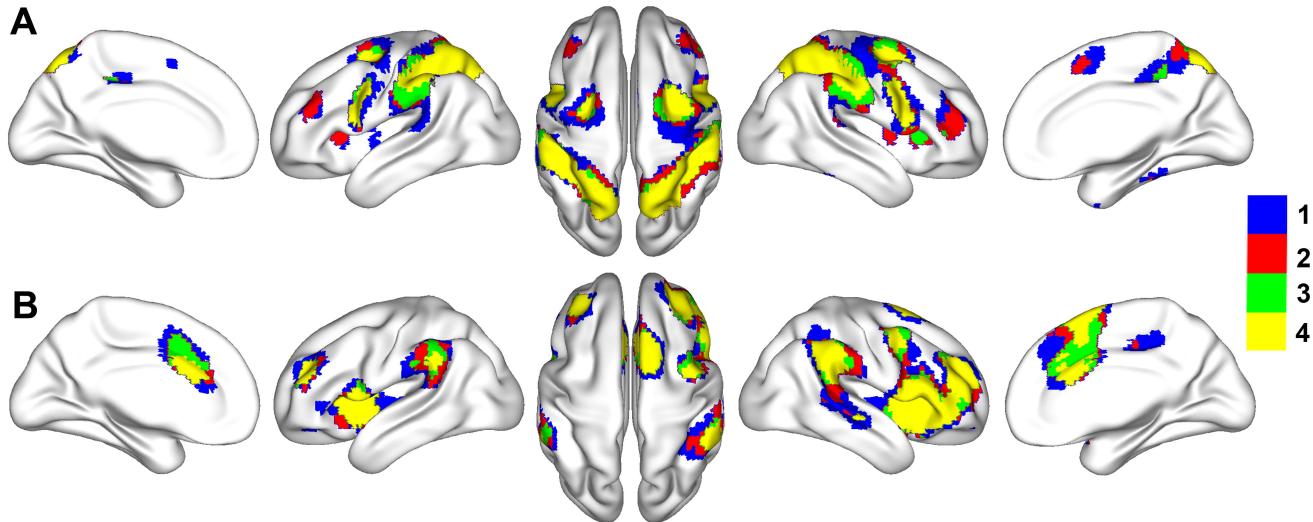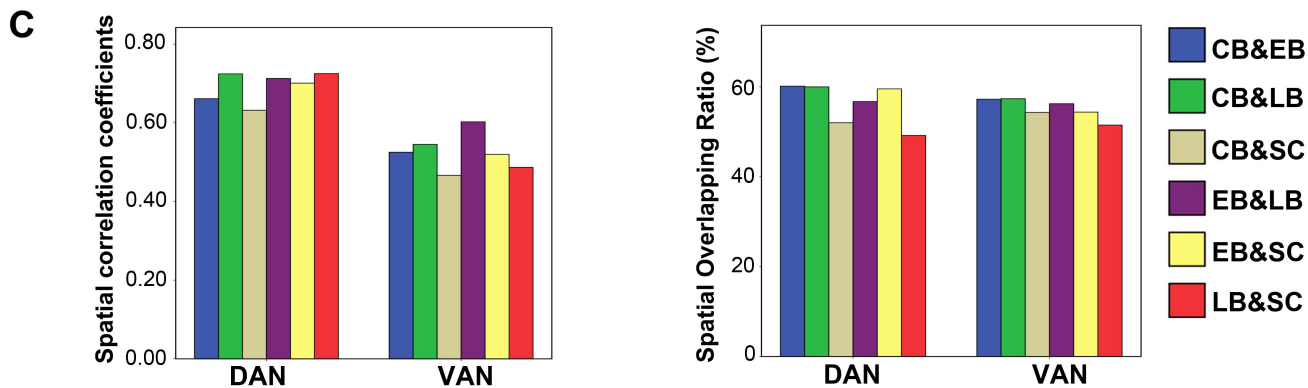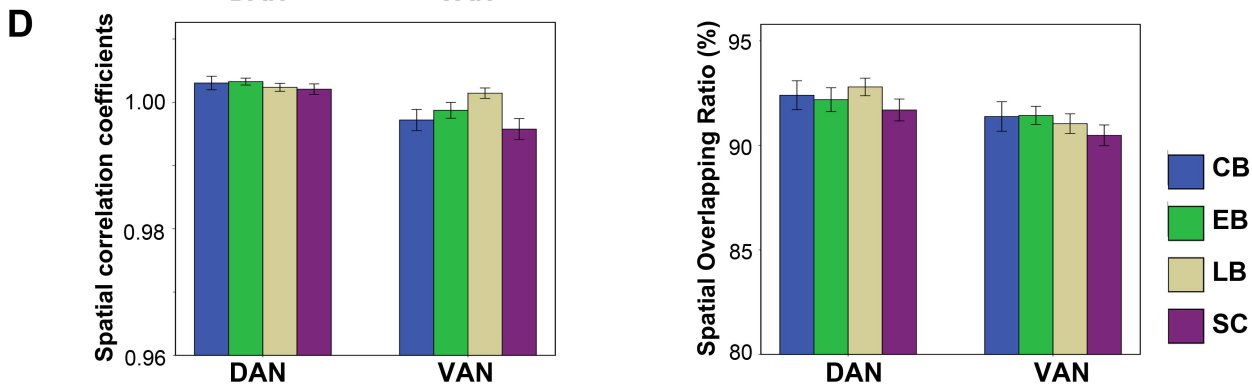

### A Doral Attention Network

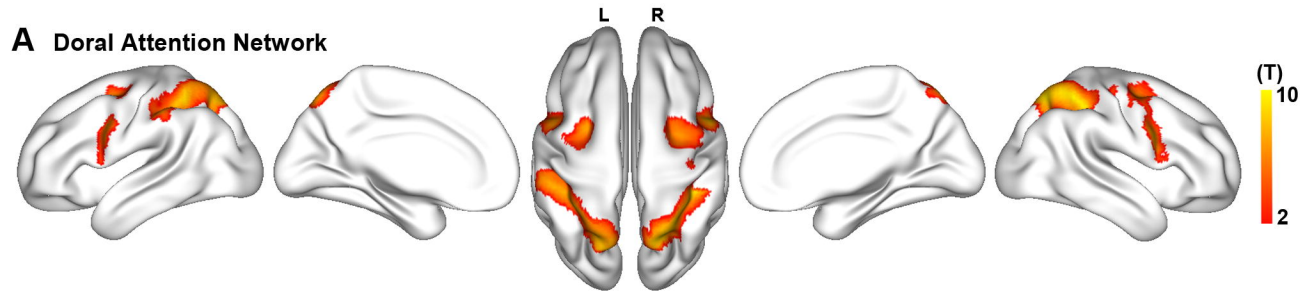

### B Ventral Attention Network

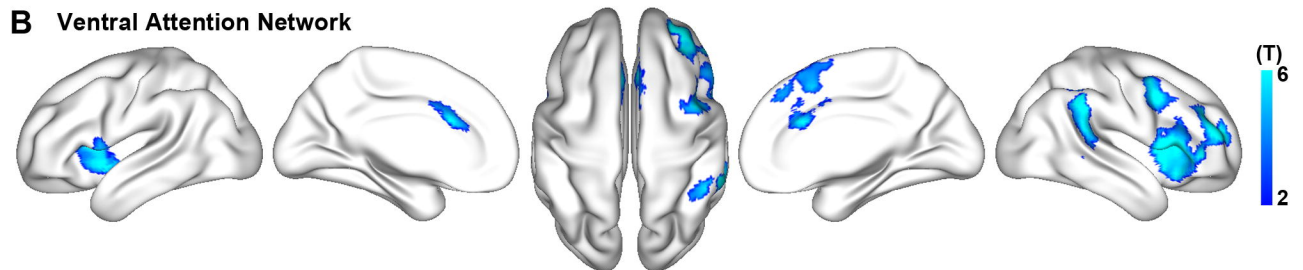

### C Overlapping Map

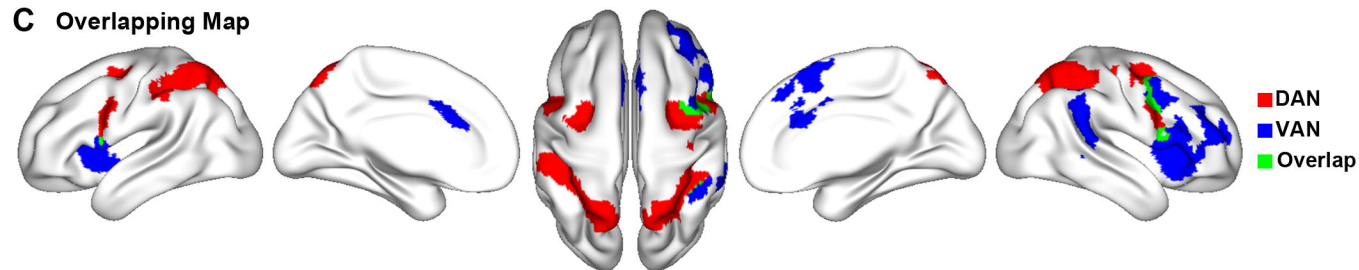

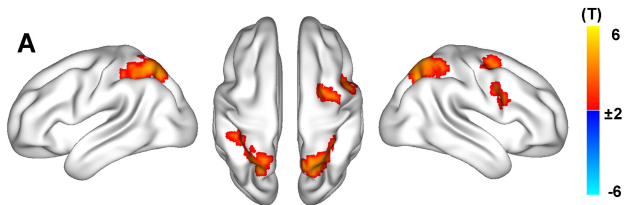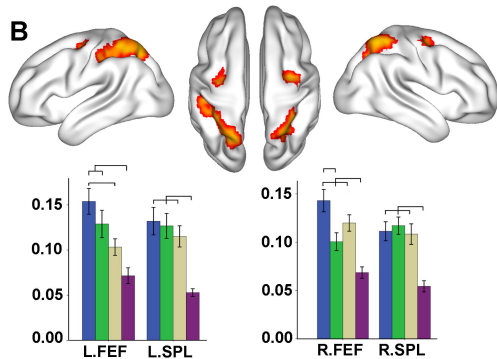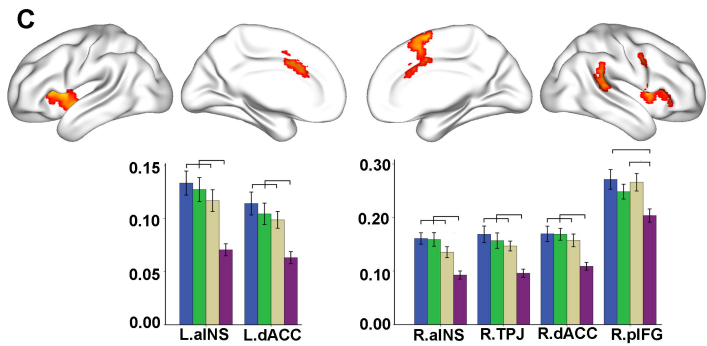

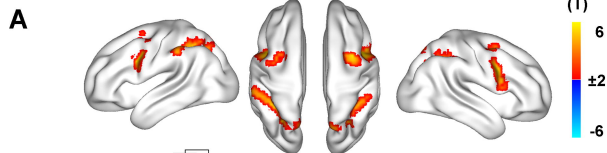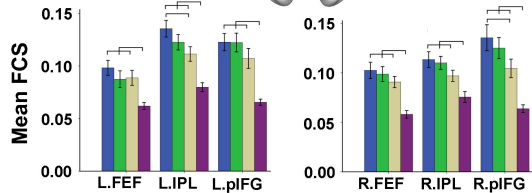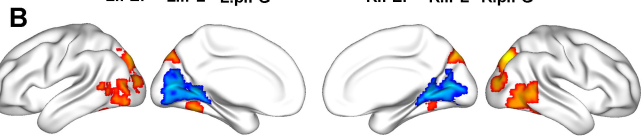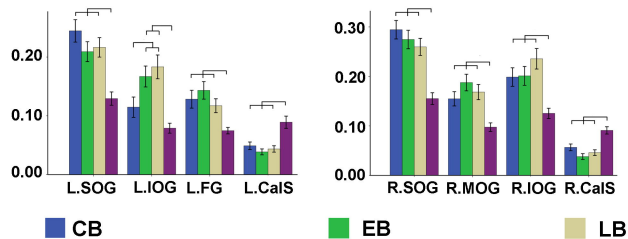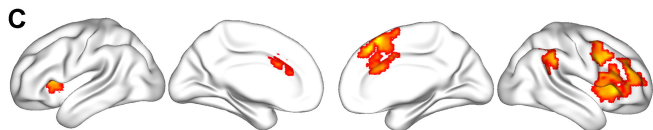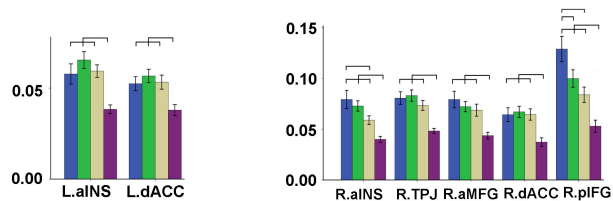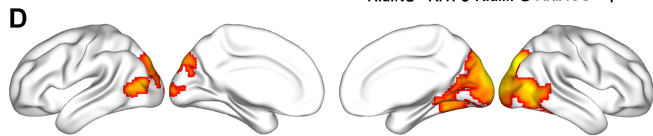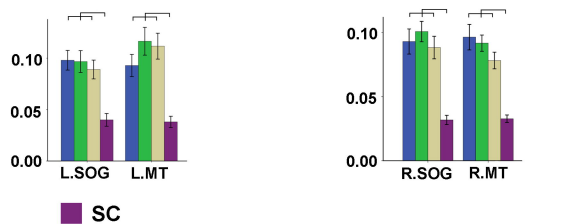

**R.pIFG**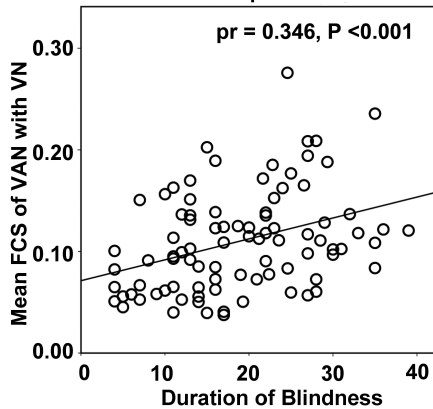**R.pIFG**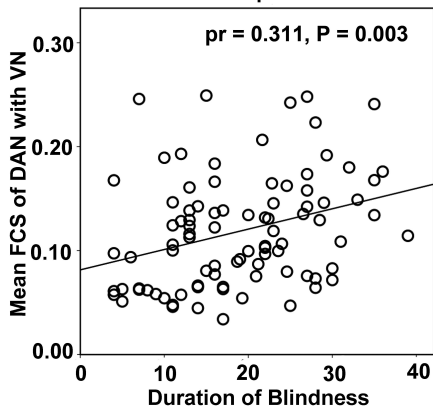**L.IOG**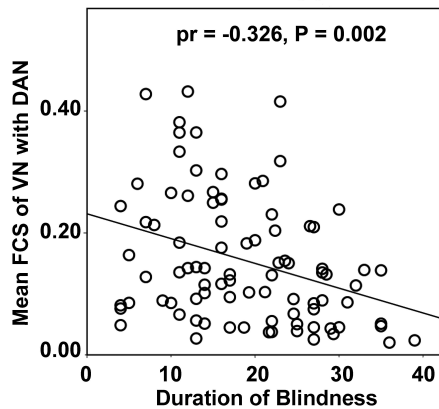

Source: https://www.biorxiv.org/content/10.1101/245399v2.full.pdf
